# Supplementary material for: Sleep deprivation causes memory deficits by negatively impacting neuronal connectivity in hippocampal area CA1
Source: eLife. 2016 Aug 23;5:e13424. doi: 10.7554/eLife.13424 (PMC4996653; doi:10.7554/eLife.13424)
Supplement: Figure 3—figure supplement 1—source data 1. — The data source file contains the optical density values (in arbitrary units) of the pcofilin and cofilin western blots for each individual animal of the non-sleep deprived (NSD) and sleep deprived (SD) group. DOI: http://dx.doi.org/10.7554/eLife.13424.011 [file elife-13424-fig3-figsupp1-data1.xlsx]

## Sheet: figure 3 figure sup 1 
	Cohort	PCOFILIN	COFILIN
	NSD	92.3698	114.142
	NSD	97.2378	115.311
	NSD	88.9384	98.8463
	NSD	93.782	106.226
	NSD	79.8	91.9651
	SD	89.6035	101.149
	SD	89.8942	108.067
	SD	88.7436	103.147
	SD	87.7264	102.615
	SD	81.6491	85.6907
