# Supplementary material for: Sleep deprivation causes memory deficits by negatively impacting neuronal connectivity in hippocampal area CA1
Source: eLife. 2016 Aug 23;5:e13424. doi: 10.7554/eLife.13424 (PMC4996653; doi:10.7554/eLife.13424)
Supplement: Figure 3—source data 1. — The data source file contains the relative optical density values (in arbitrary units) of the pcofilin and cofilin western blots for each individual animal of the non-sleep deprived (NSD) and sleep deprived (SD) group. DOI: http://dx.doi.org/10.7554/eLife.13424.009 [file elife-13424-fig3-data1.xlsx]

## Sheet: Figure3 A
		pCofilin	cofilin
	NSD	0.979482	0.506485
	NSD	0.827231	0.831491
	NSD	1.04108	0.698318
	NSD	0.867542	0.986121
	NSD	0.8112	1.24874
	NSD	1.12826	1.42315
	NSD	1.19226	1.20898
	NSD	1.07202	1.26711
	NSD	1.08092	0.829611
	NSD	1.09552	0.977223
	NSD	1.0397	1.09372
	NSD	0.87012	0.890996
	NSD	0.88065	0.731642
	NSD	1.11401	1.30642
	SD	0.705244	0.056281
	SD	1.03326	0.319096
	SD	1.04543	0.638046
	SD	0.917821	0.378881
	SD	0.753606	0.406605
	SD	0.848976	1.19597
	SD	0.994348	0.674198
	SD	0.990326	0.868083
	SD	1.02556	0.517011
	SD	1.04049	0.965287
	SD	0.843692	0.694981
	SD	1.03878	0.963188
	SD	1.08151	0.795848
