# Supplementary material for: Sleep deprivation causes memory deficits by negatively impacting neuronal connectivity in hippocampal area CA1
Source: eLife. 2016 Aug 23;5:e13424. doi: 10.7554/eLife.13424 (PMC4996653; doi:10.7554/eLife.13424)
Supplement: Figure 4—figure supplement 1—source data 1. — (A) The data source file contains the total object exploration times during the three training sessions for each individual animal of all four groups. (B) The data source file contains the time spent in the closed arms of the zero maze for each individual animal of both groups. (C) The data source file contains the number of transitions in the zero maze for each individual animal of both groups. (D) The data source file contains the object exploration times for the displaced (DO) and non-displaced objects (NDO1, NDO2) for each individual animal of both groups. DOI: http://dx.doi.org/10.7554/eLife.13424.016 [file elife-13424-fig4-figsupp1-data1.xlsx]

## Sheet: Fig 4-supfig1A
			session 1	Session 2	Session 3
	EGFP NSD		14.013	24.953	10.835
	EGFP NSD		14.594	13.032	7.327
	EGFP NSD		28.72	17.094	15.337
	EGFP NSD		25.255	12.842	17.211
	EGFP NSD		11.361	7.682	5.34
	EGFP NSD		30.004	23.523	11.02
	EGFP NSD		21.356	11.202	4.7
	EGFP NSD		13.666	8.91	3.566
	EGFP NSD		17.825	13.305	7.707
	EGFP NSD		10.96	5.902	7.089
	EGFP SD		26.247	17.031	8.644
	EGFP SD		21.287	12.511	6.735
	EGFP SD		30.254	16.795	20.488
	EGFP SD		27.424	21.636	18.803
	EGFP SD		1.606	8.503	5.904
	EGFP SD		5.939	6.076	3.304
	EGFP SD		24.468	12.417	10.038
	EGFP SD		10.061	8.235	13.028
	EGFP SD		19.874	7.101	8.74
	EGFP SD		16.413	15.596	12.906
	cofilinS3D NSD		19.31	8.597	7.636
	cofilinS3D NSD		16.582	13.987	13.083
	cofilinS3D NSD		18.321	11.14	10.908
	cofilinS3D NSD		34.226	22.967	13.808
	cofilinS3D NSD		19.868	17.431	14.404
	cofilinS3D NSD		22.207	16.299	4.586
	cofilinS3D NSD		23.32	15.877	10.41
	cofilinS3D NSD		23.095	19.755	5.369
	cofilinS3D NSD		19.242	12.413	8.062
	cofilinS3D NSD		18.98	8.364	4.624
	cofilinS3D NSD		21.644	16.793	8.125
	cofilin S3D SD		9.605	9.867	14.615
	cofilin S3D SD		19.265	18.341	10.662
	cofilin S3D SD		27.784	12.989	7.825
	cofilin S3D SD		27.375	10.579	17.011
	cofilin S3D SD		22.839	15.885	6.251
	cofilin S3D SD		26.709	12.098	12.581
	cofilin S3D SD		14.266	19.292	11.384
	cofilin S3D SD		16.762	14.894	11.27

## Sheet: Fig 4-supfig1B
				time in closed arm in seconds out of 300 seconds
		EGFP		234
		EGFP		208
		EGFP		211
		EGFP		226
		EGFP		242
		EGFP		254
		EGFP		194
		CofilinS3D		232
		CofilinS3D		187
		CofilinS3D		218
		CofilinS3D		256
		CofilinS3D		210
		CofilinS3D		233
		CofilinS3D		191

## Sheet: Fig 4-supfig1C
	EGFP	12
	EGFP	23
	EGFP	21
	EGFP	14
	EGFP	14
	EGFP	8
	EGFP	19
	CofilinS3D	15
	CofilinS3D	24
	CofilinS3D	7
	CofilinS3D	9
	CofilinS3D	15
	CofilinS3D	8
	CofilinS3D	28

## Sheet: Fig 4-supfig1D
		NDO1	NDO2	DO
	EGFP	2.879	1.497	2.077
	EGFP	3.759	1.088	8.562
	EGFP	3.555	2.119	5.901
	EGFP	2.175	1.672	6.234
	EGFP	1.44	2.041	7.63
	EGFP	1.457	0.688	7.056
	EGFP	2.329	0.431	2.506
	EGFP	1.891	2.32	7.452
	cofilinS3D	3.922	0.607	4.354
	cofilinS3D	1.063	1.041	4.519
	cofilinS3D	4.429	2.776	5.089
	cofilinS3D	3.549	1.056	6.992
	cofilinS3D	3.064	1.752	4.4
	cofilinS3D	1.809	1.216	2.769
	cofilinS3D	1.135	0.528	2.2
