# Supplementary material for: Sleep deprivation causes memory deficits by negatively impacting neuronal connectivity in hippocampal area CA1
Source: eLife. 2016 Aug 23;5:e13424. doi: 10.7554/eLife.13424 (PMC4996653; doi:10.7554/eLife.13424)
Supplement: Figure 4—source data 1. — The data source file contains the object exploration times for the displaced (DO) and non-displaced objects (NDO1, NDO2) for all individual animals of each group. DOI: http://dx.doi.org/10.7554/eLife.13424.014 [file elife-13424-fig4-data1.xlsx]

## Sheet: Figure 4A
		NDO1	NDO2	DO
	EGFP NSD	6.1	2.361	8.714
	EGFP NSD	5.101	1.661	4.932
	EGFP NSD	14.79	2.212	12.596
	EGFP NSD	9.955	4.265	15
	EGFP NSD	8.275	2.115	7.096
	EGFP NSD	2.65	2.716	3.139
	EGFP NSD	2.724	1.323	3.378
	EGFP NSD	4.76	2.342	9.895
	EGFP NSD	2.559	2.928	3.775
	EGFP NSD	2.315	0.668	2.315
	EGFP SD	10.713	5.586	9.892
	EGFP SD	7.363	10.965	6.94
	EGFP SD	12.971	9.833	10.971
	EGFP SD	7.358	2.079	4.554
	EGFP SD	2.292	2.74	2.791
	EGFP SD	5.67	1.42	2.724
	EGFP SD	6.95	3.479	9.79
	EGFP SD	3.328	6.751	3.722
	EGFP SD	6.695	1.971	4.648
	EGFP SD	7.873	0.479	3.54
	CofilinS3D NSD	8.669	3.605	6.474
	CofilinS3D NSD	4.446	6.06	8.028
	CofilinS3D NSD	4.778	3.976	9.722
	CofilinS3D NSD	4.074	6.749	9.917
	CofilinS3D NSD	3.14	2.194	10.201
	CofilinS3D NSD	0.878	1.584	3.287
	CofilinS3D NSD	2.079	1.376	5.636
	CofilinS3D NSD	6.202	1.172	8.43
	CofilinS3D NSD	5.922	0.884	5.713
	CofilinS3D NSD	2.618	3.044	7.542
	Cofilin S3D	8.801	2.051	6.83
	Cofilin S3D	9.257	0.599	6.308
	Cofilin S3D	5.282	1.816	6.602
	Cofilin S3D	3.902	1.444	9.361
	Cofilin S3D	2.17	5.481	6.736
	Cofilin S3D	6.506	4.504	10.42
	Cofilin S3D	6.26	1.103	7.922
	Cofilin S3D	0.142	0.626	4.722
	Cofilin S3D	2.69	6.566	11.74
