# Supplementary material for: Sleep deprivation causes memory deficits by negatively impacting neuronal connectivity in hippocampal area CA1
Source: eLife. 2016 Aug 23;5:e13424. doi: 10.7554/eLife.13424 (PMC4996653; doi:10.7554/eLife.13424)
Supplement: Figure 5—figure supplement 1—source data 1. — (D) The data source file contains the total object exploration times during the three training sessions for each individual animal of all four groups. (E) The data source file contains the time spent in the periphery and center of the open field for each individual animal of both groups. (H) The data source file contains the total object exploration times during the three training sessions for each individual animal of all four groups. (I) The data source file contains the object exploration times for the displaced (DO) and non-displaced objects (NDO1, NDO2) for each individual animal of each group. DOI: http://dx.doi.org/10.7554/eLife.13424.021 [file elife-13424-fig5-figsupp1-data1.xlsx]

## Sheet: Fig 5-supfig1A
	eGFP	364.448
	eGFP	449.639
	eGFP	355.569
	eGFP	351.327
	eGFP	418.057
	eGFP	310.923
	eGFP	396.395
	PDE4AA5catnul	318.846
	PDE4AA5catnul	351.551
	PDE4AA5catnul	450.088
	PDE4AA5catnul	317.329
	PDE4AA5catnul	247.901
	PDE4AA5catnul	302.943
	PDE4AA5catnul	279.763

## Sheet: Fig 5-supfig1B
	EGFP	490.668
	EGFP	449.567
	EGFP	482.562
	EGFP	541.018
	EGFP	480.051
	EGFP	558.867
	EGFP	581.168
	EGFP	473.885
	PDE45catnul	503.456
	PDE45catnul	337.756
	PDE45catnul	464.105
	PDE45catnul	494.702
	PDE45catnul	532.265
	PDE45catnul	468.9
	PDE45catnul	449.034

## Sheet: Fig 5-supfig1C
		GFP	406.817
		GFP	339.797
		GFP	447.997
		GFP	394.655
		GFP	465.653
		GFP	410.394
		GFP	467.113
		PDE45catnul	327.105
		PDE45catnul	483.596
		PDE45catnul	344.347
		PDE45catnul	337.536
		PDE45catnul	433.374
		PDE45catnul	395.685
		PDE45catnul	371.161
		PDE45catnul	427.793

## Sheet: Fig 5-supfig1D
		S1	S2	S3
EGFP NSD		18.154	12.582	18.284
EGFP NSD		36.507	8.819	6.456
EGFP NSD		22.63	18.435	7.032
EGFP NSD		19.687	12.626	9.074
EGFP NSD		25.85	13.048	10.827
EGFP NSD		21.868	14.983	6.66
EGFP NSD		16.887	6.732	5.009
EGFP NSD		8.946	9.317	5.729
EGFP NSD		13.876	14.415	8.391
EGFP SD		19.988	15.487	8.222
EGFP SD		23.448	10.133	4.657
EGFP SD		30.987	13.736	9.94
EGFP SD		15.159	11.26	11.548
EGFP SD		36.148	27.29	13.84
EGFP SD		11.546	9.884	8.389
EGFP SD		9.224	11.354	6.63
EGFP SD		21.973	12.864	10.978
PDE4A5DN NSD		16.063	13.724	7.583
PDE4A5DN NSD		22.454	11.218	13.346
PDE4A5DN NSD		25.774	22.001	14.892
PDE4A5DN NSD		11.318	17.484	12.841
PDE4A5DN NSD		23.789	13.411	11.684
PDE4A5DN NSD		8.09	6.767	4.123
PDE4A5DN NSD		8.985	8.623	10.127
PDE4A5DN NSD		19.1	13.763	10.92
PDE4A5DN NSD		13.262	5.454	14.441
PDE4A5DN NSD		10.759	8.459	15.068
PDE4A5DN SD		14.778	18.62	20.702
PDE4A5DN SD		16.39	12.488	15.563
PDE4A5DN SD		31.954	24.089	8.414
PDE4A5DN SD		19.855	16.157	15.328
PDE4A5DN SD		31.157	23.952	15.695
PDE4A5DN SD		23.539	15.03	16.569
PDE4A5DN SD		25.028	20.072	17.778
PDE4A5DN SD		10.228	9.524	5.711
PDE4A5DN SD		8.436	6.908	9.143
PDE4A5DN SD		11.365	7.654	9.097

## Sheet: Fig 5-supfig1E
	periphery	center
gfp	87	13
gfp	84.1	15.9
gfp	85.4	15.1
gfp	80.6	19.4
gfp	92	8
gfp	78.3	21.8
gfp	83.1	16.9
gfp	76.2	23.8
pde4a5DN	85.6	14.4
pde4a5DN	98.2	1.8
pde4a5DN	92	9.5
pde4a5DN	73.6	27.4
pde4a5DN	97.7	2.3
pde4a5DN	77	23
pde4a5DN	99.7	0.3
pde4a5DN	78.9	21.1

## Sheet: Fig 5-supfig1H
	S1	S2	S3
EGFP NSD	27.175	7.29	7.89
EGFP NSD	19.735	17.178	15.155
EGFP NSD	13.041	16.652	14.377
EGFP NSD	19.145	16.005	10.739
EGFP NSD	16.465	10.883	11.356
EGFP NSD	17.36	16.571	14.181
EGFP NSD	19.214	10.83	22.645
EGFP NSD	20.279	16.632	11.705
EGFP NSD	13.629	11.704	9.375
eGFP SD	11.981	28.957	13.415
eGFP SD	15.284	11.309	6.946
eGFP SD	19.6199	10.89	9.902
eGFP SD	15.774	12.874	16.939
eGFP SD	16.204	15.487	16.958
eGFP SD	12.827	9.609	8.546
eGFP SD	8.561	1.309	0.884
PDE4A5DNdelta4 NSD	13.953	6.044	19.997
PDE4A5DNdelta4 NSD	23.437	17.224	40.661
PDE4A5DNdelta4 NSD	16.668	15.947	32.615
PDE4A5DNdelta4 NSD	16.196	14.76	30.956
PDE4A5DNdelta4 NSD	18.901	11.383	30.284
PDE4A5DNdelta4 NSD	2.569	5.802	8.371
PDE4A5DNdelta4 NSD	15.133	18.517	33.65
PDE4A5DNdelta4 NSD	16.484	22.741	12.1
PDE4A5DNdelta4 NSD	19.366	16.343	11.85
PDE4A5DNdelta4 SD	21.864	14.064	15.537
PDE4A5DNdelta4 SD	8.547	16.519	5.577
PDE4A5DNdelta4 SD	22.318	9.023	5.8
PDE4A5DNdelta4 SD	13.434	6.208	4.051
PDE4A5DNdelta4 SD	10.703	9.707	8.798
PDE4A5DNdelta4 SD	19.9	11.2	7.597
PDE4A5DNdelta4 SD	14.179	7.835	9.885
PDE4A5DNdelta4 SD	14.646	13.518	6.842

## Sheet: Fig 5-supfig1I
		NDO1	NDO2	DO
EGFP NSD		1.09	1.699	4.141
EGFP NSD		1.747	0.206	1.68
EGFP NSD		4.788	1.517	10.718
EGFP NSD		2.782	1.362	5.697
EGFP NSD		1.731	2.68	5.08
EGFP NSD		5.849	1.531	11.057
EGFP NSD		5.488	1.543	4.164
EGFP NSD		5.006	4.763	11.597
EGFP NSD		1.446	0.474	9.868
eGFP SD		4.745	3.883	3.594
eGFP SD		3.592	0.526	2.554
eGFP SD		0.413	3.85	2.894
eGFP SD		5.243	4.501	4.918
eGFP SD		3.663	1.642	1.924
eGFP SD		6.065	1.746	2.694
eGFP SD		0.762	0.655	2.958
PDE4A5DNdelta4 NSD		3.146	0.703	1.733
PDE4A5DNdelta4 NSD		3.689	5.64	6.473
PDE4A5DNdelta4 NSD		2.886	1.173	2.902
PDE4A5DNdelta4 NSD		2.714	0	3.818
PDE4A5DNdelta4 NSD		2.497	0.806	6.116
PDE4A5DNdelta4 NSD		3.748	1.371	11.788
PDE4A5DNdelta4 NSD		1.588	2.263	6.582
PDE4A5DNdelta4 NSD		5.911	2.196	7.583
PDE4A5DNdelta4 NSD		3.893	1.725	6.719
PDE4A5DNdelta4 SD		9.299	3.128	4.102
PDE4A5DNdelta4 SD		4.609	3.6	3.654
PDE4A5DNdelta4 SD		3.411	1.298	3.171
PDE4A5DNdelta4 SD		6.599	4.11	3.824
PDE4A5DNdelta4 SD		0.814	2.975	0.552
PDE4A5DNdelta4 SD		1.481	3.245	3.765
PDE4A5DNdelta4 SD		2.411	0.706	4.048
PDE4A5DNdelta4 SD		9.847	1.267	3.46
