# Supplementary material for: Sleep deprivation causes memory deficits by negatively impacting neuronal connectivity in hippocampal area CA1
Source: eLife. 2016 Aug 23;5:e13424. doi: 10.7554/eLife.13424 (PMC4996653; doi:10.7554/eLife.13424)
Supplement: Figure 5—source data 1. — (K) The data source file contains the relative optical density values (in arbitrary units) of the pLIMK and LIMK western blots for each individual animal of both the non-sleep deprived control group (NSD) and the group that underwent 5 hr of sleep deprivation followed by 3 hr of recovery sleep (SD + RS). (L) The data source file contains the relative optical density values (in arbitrary units) of the pcofilin and cofilin western blots for each individual animal of both the non-sleep deprived control group (NSD) and the group that underwent 5 hr of sleep deprivation followed by 3 hr of recovery sleep (SD + RS). (M) The data source file contains the object exploration times for the displaced (DO) and non-displaced objects (NDO1, NDO2) for each individual animal of each group. DOI: http://dx.doi.org/10.7554/eLife.13424.019 [file elife-13424-fig5-data1.xlsx]

## Sheet: Figure 5K
			pLIMK	LIMK
		NSD	100.517	103.044
		NSD	118.216	148.438
		NSD	121.966	139.473
		NSD	126.379	160.644
		NSD	120.014	162.921
		NSD	115.79	148.885
		NSD	126.65	153.049
		SD +RS	107.948	131.984
		SD +RS	116.454	124.463
		SD +RS	118.242	131.234
		SD +RS	128.214	164.283
		SD +RS	123.724	144.588
		SD +RS	122.797	153.293
		SD +RS	129.554	146.645

## Sheet: Figure 5L
		pcofilin	cofilin
	NSD	127.197	78.95
	NSD	128.192	68.2868
	NSD	129.197	77.3571
	NSD	129.888	70.0489
	NSD	136.015	62.265
	NSD	139.341	72.1415
	NSD	141.784	79.5543
	NSD	148.788	82.868
	SD +RS	123.153	70.8272
	SD +RS	132.566	75.8884
	SD +RS	134.223	68.0634
	SD +RS	137.241	71.3412
	SD +RS	137.404	73.492
	SD +RS	141.362	70.027
	SD +RS	142.696	70.8172

## Sheet: FIGURE 5M
			NDO1	NDO2	DO
		egfp NSD	2.84	4.02	6.31
		egfp NSD	5.01	2.15	8.68
		egfp NSD	5.38	2.66	7.53
		egfp NSD	2.88	2.8	8.34
		egfp NSD	2.71	0.83	6.52
		egfp NSD	5.54	1.95	3.85
		egfp NSD	6.5	1.66	9.42
		egfp NSD	5.84	2.5	8.66
		egfp NSD	3.16	3.84	8.65
		EGFP SD	6.2	2.46	3.14
		EGFP SD	3.68	3.28	5.4
		EGFP SD	4.76	1.58	2.4
		EGFP SD	1.1	2.72	4.13
		EGFP SD	7.47	2	2.24
		EGFP SD	6.39	2.78	5.55
		EGFP SD	7.03	8.34	13.44
		EGFP SD	1.2	1.47	2.23
		PDE4A5 NSD	6.26	2.38	6.92
		PDE4A5 NSD	2.54	2.02	12.01
		PDE4A5 NSD	3.4	7.13	4.37
		PDE4A5 NSD	3.39	1.53	8.19
		PDE4A5 NSD	2.5	6.73	8.47
		PDE4A5 NSD	7.91	2.27	6.93
		PDE4A5 NSD	10.24	3.74	12.28
		PDE4A5 NSD	5.45	1.38	3.11
		PDE4A5 NSD	3.2	2.79	9.72
		PDE4A5 NSD	9.23	6.15	12.82
		PDE4A5 SD	4.01	3.64	8.97
		PDE4A5 SD	4.03	2.75	5.12
		PDE4A5 SD	9.12	4.29	9.15
		PDE4A5 SD	5.76	3.23	9.55
		PDE4A5 SD	4.2	2.26	7.1
		PDE4A5 SD	2.3	3.5	9.18
		PDE4A5 SD	0.88	6.64	9.77
		PDE4A5 SD	3.03	0.38	3.95
		PDE4A5 SD	5	0.56	8.58
		PDE4A5 SD	5.34	6.34	12.24
