# Supplementary figures and images for: Sleep deprivation causes memory deficits by negatively impacting neuronal connectivity in hippocampal area CA1
Source: eLife journal article supplement (doi:10.7554/elife.13424), 2016-08-22

Figure 4-figure supplement 1, Havekes et al

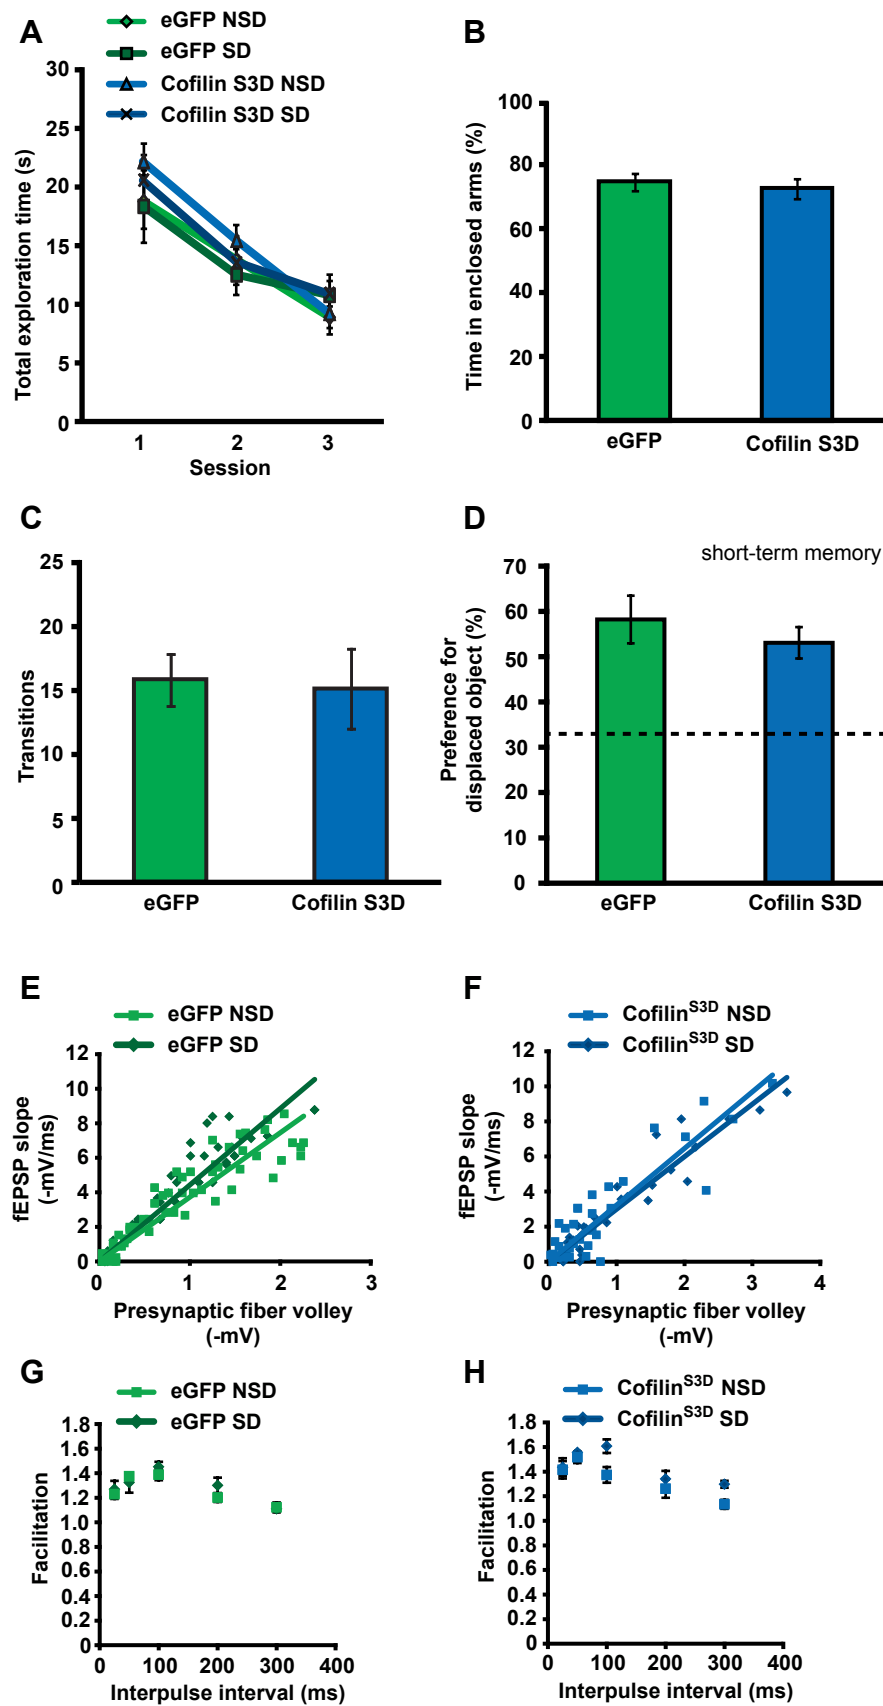

Supplement: supp [file elife-13424-supp-v1.zip]

Figure 1-figure supplement 2, Havekes et al

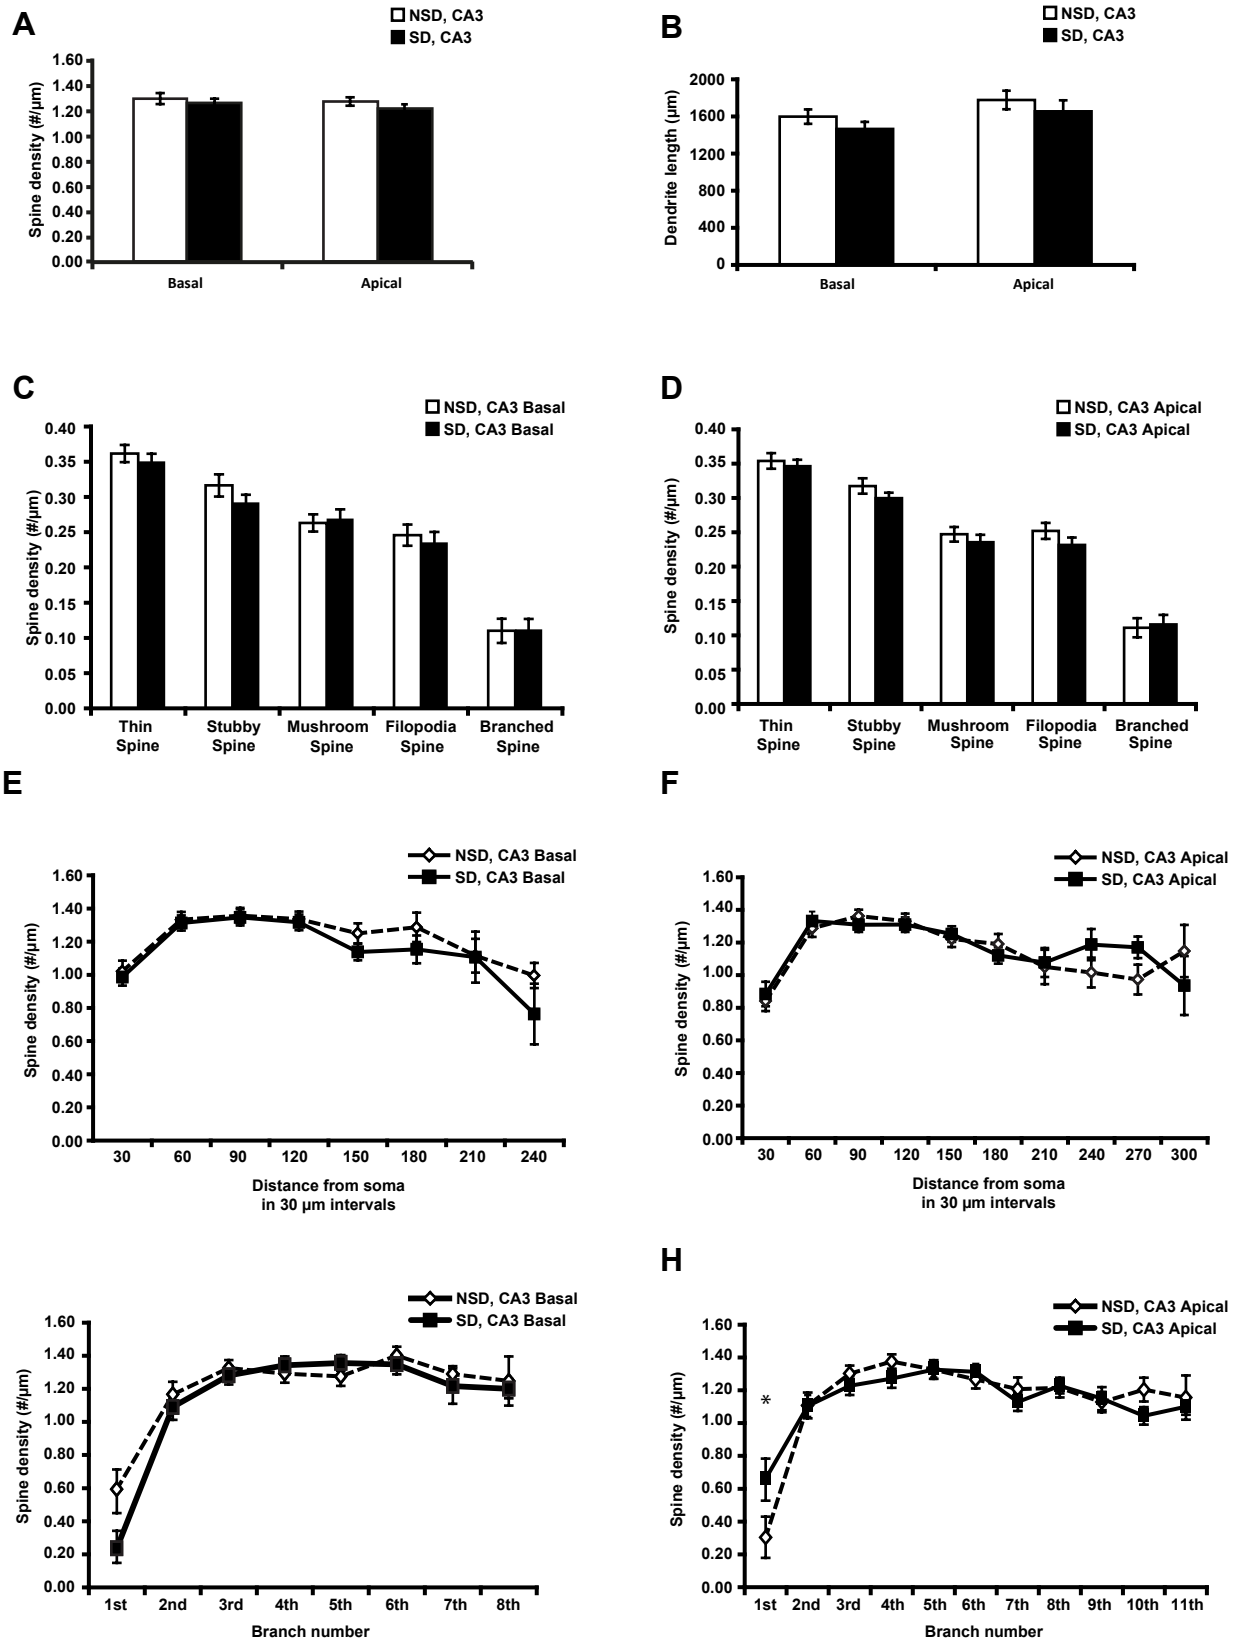

Supplement: supp [file elife-13424-supp-v1.zip]

Figure 3-figure supplement 1, Havekes et al

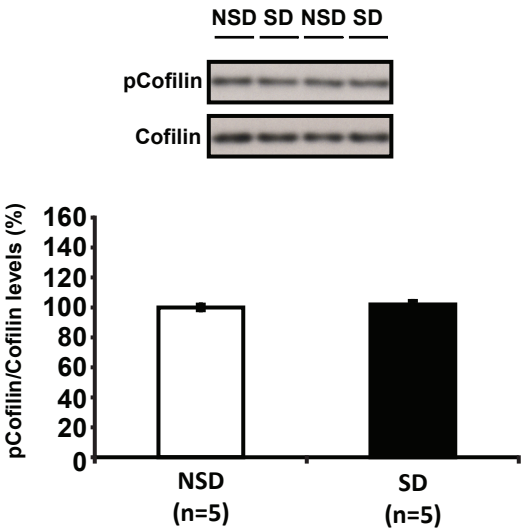

Supplement: supp [file elife-13424-supp-v1.zip]

Figure 2-figure supplement 1, Havekes et al

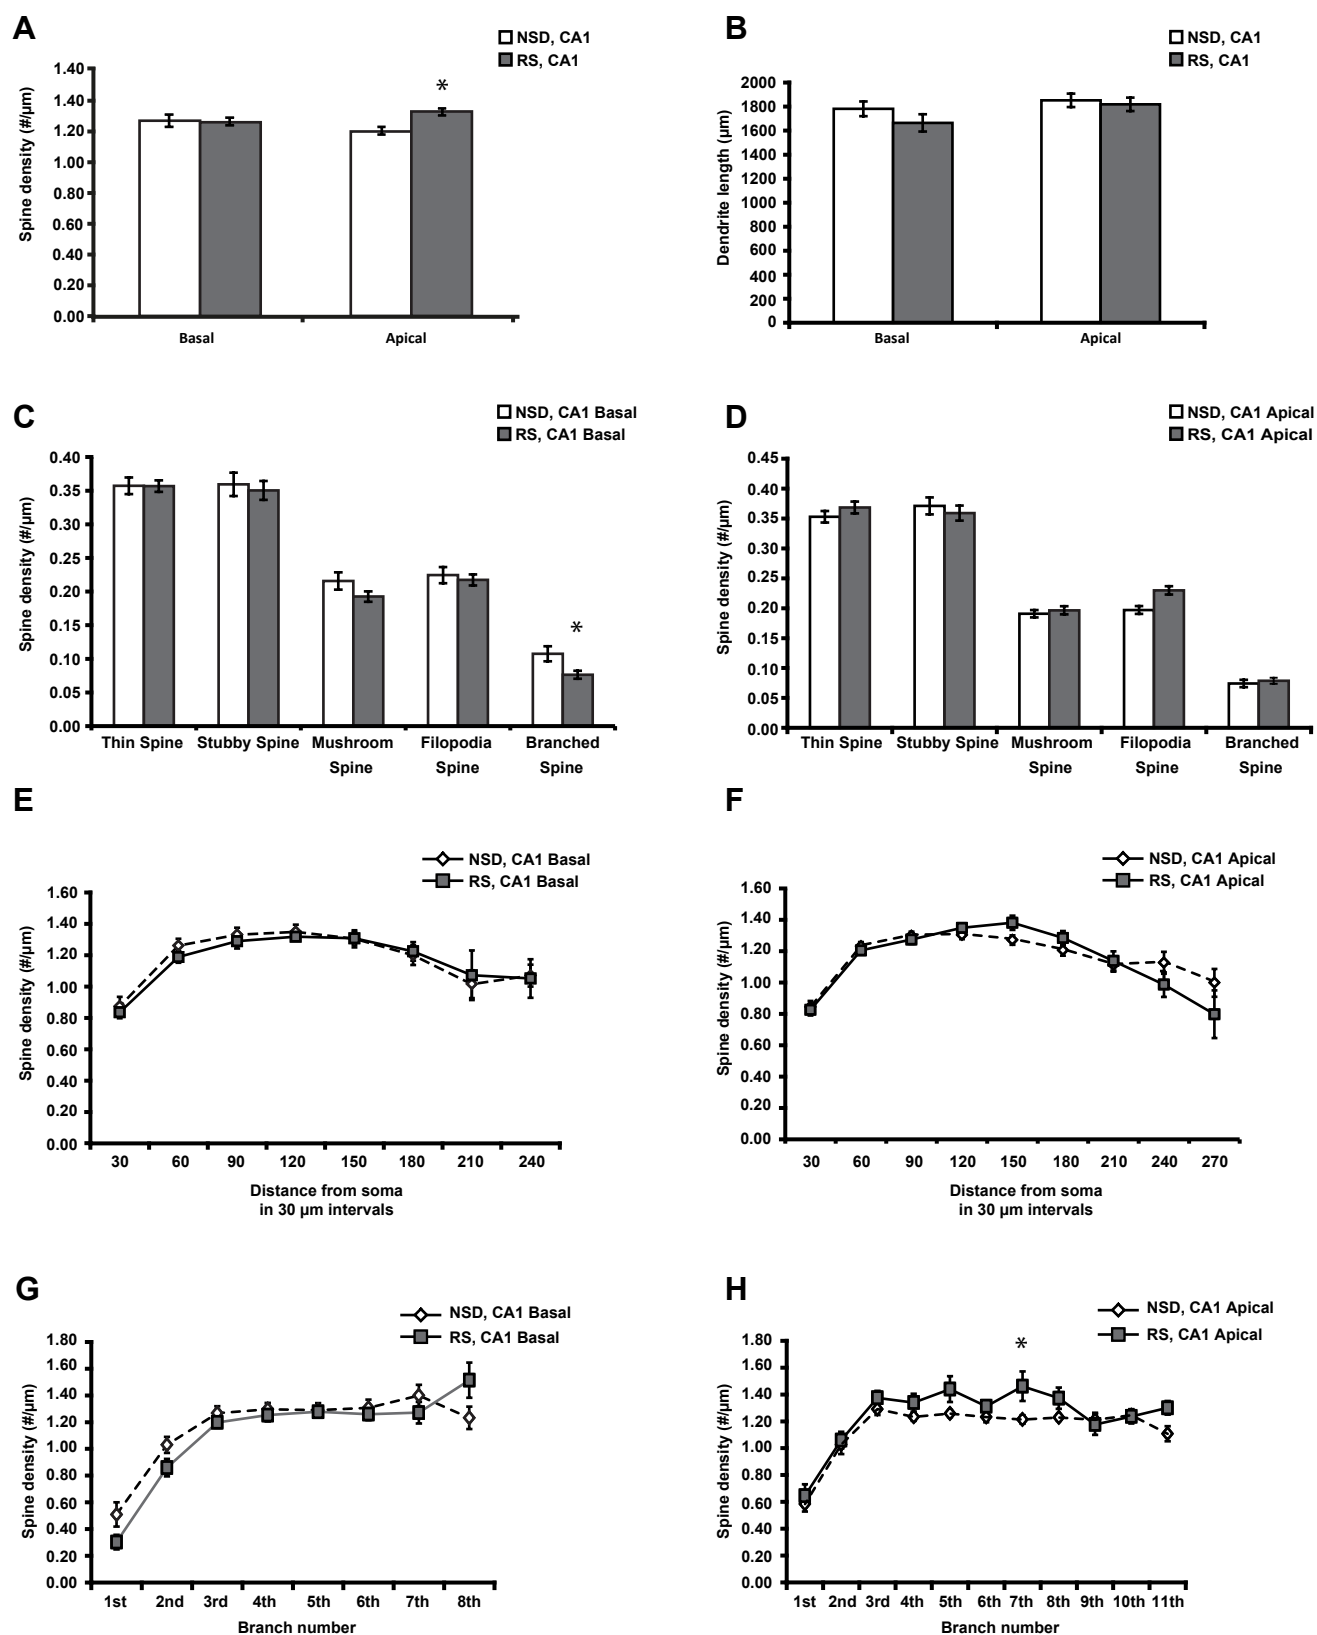

Supplement: supp [file elife-13424-supp-v1.zip]

Figure 4-figure supplement 2, Havekes et al

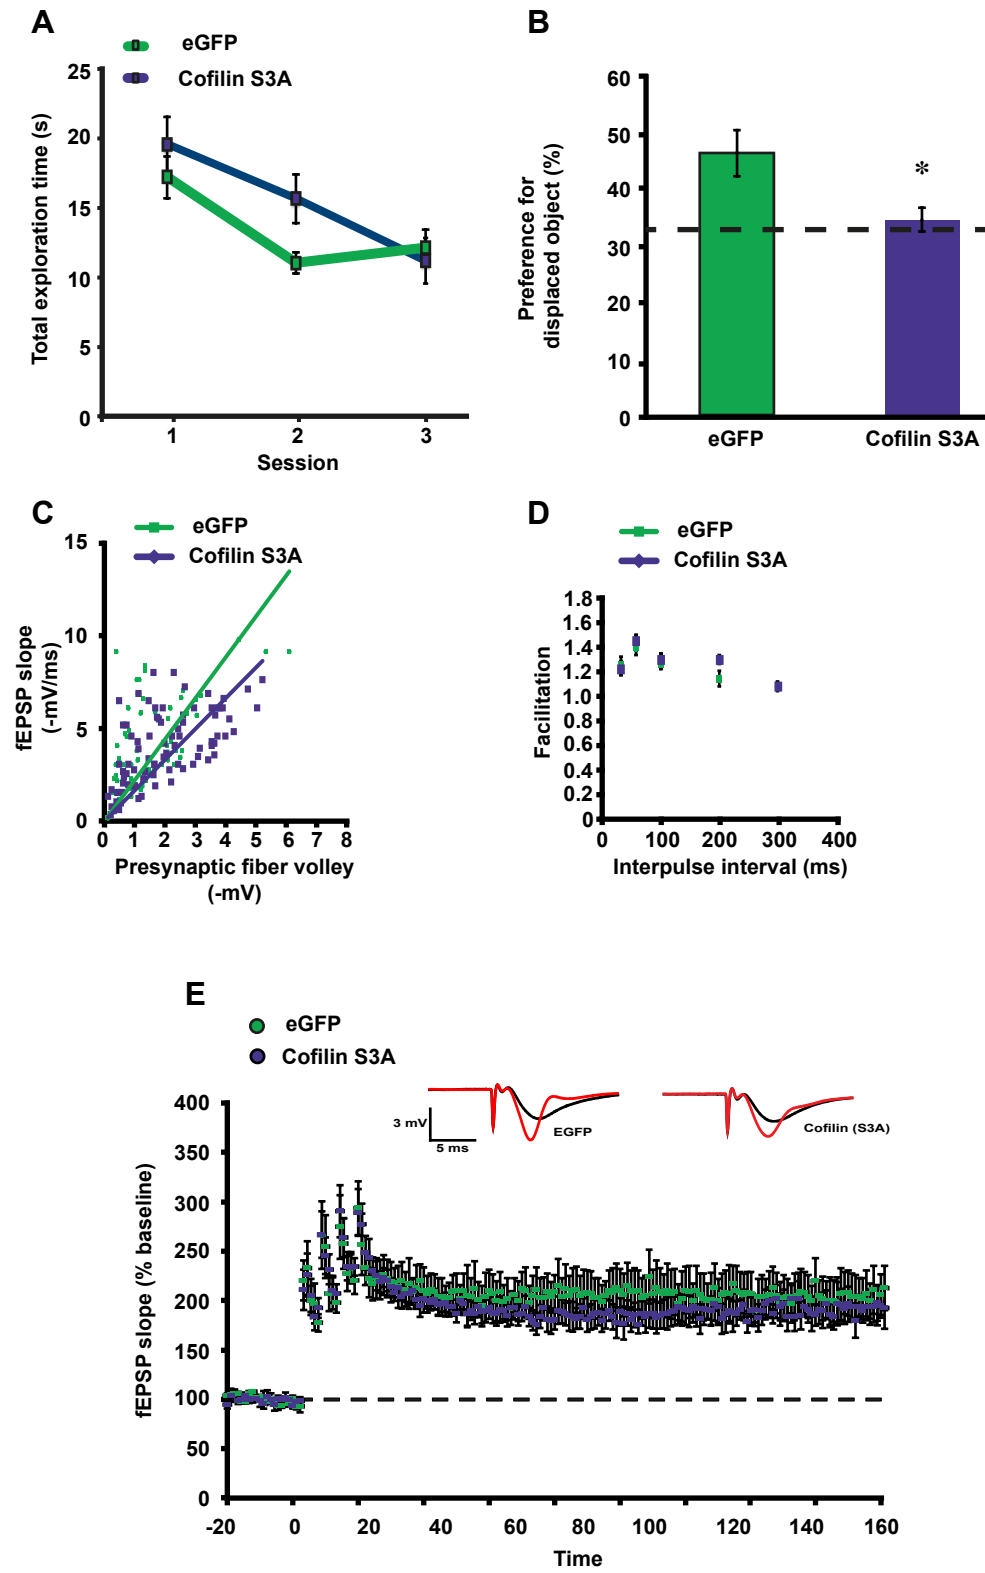

Supplement: supp [file elife-13424-supp-v1.zip]

Figure 1-figure supplement 1, Havekes et al

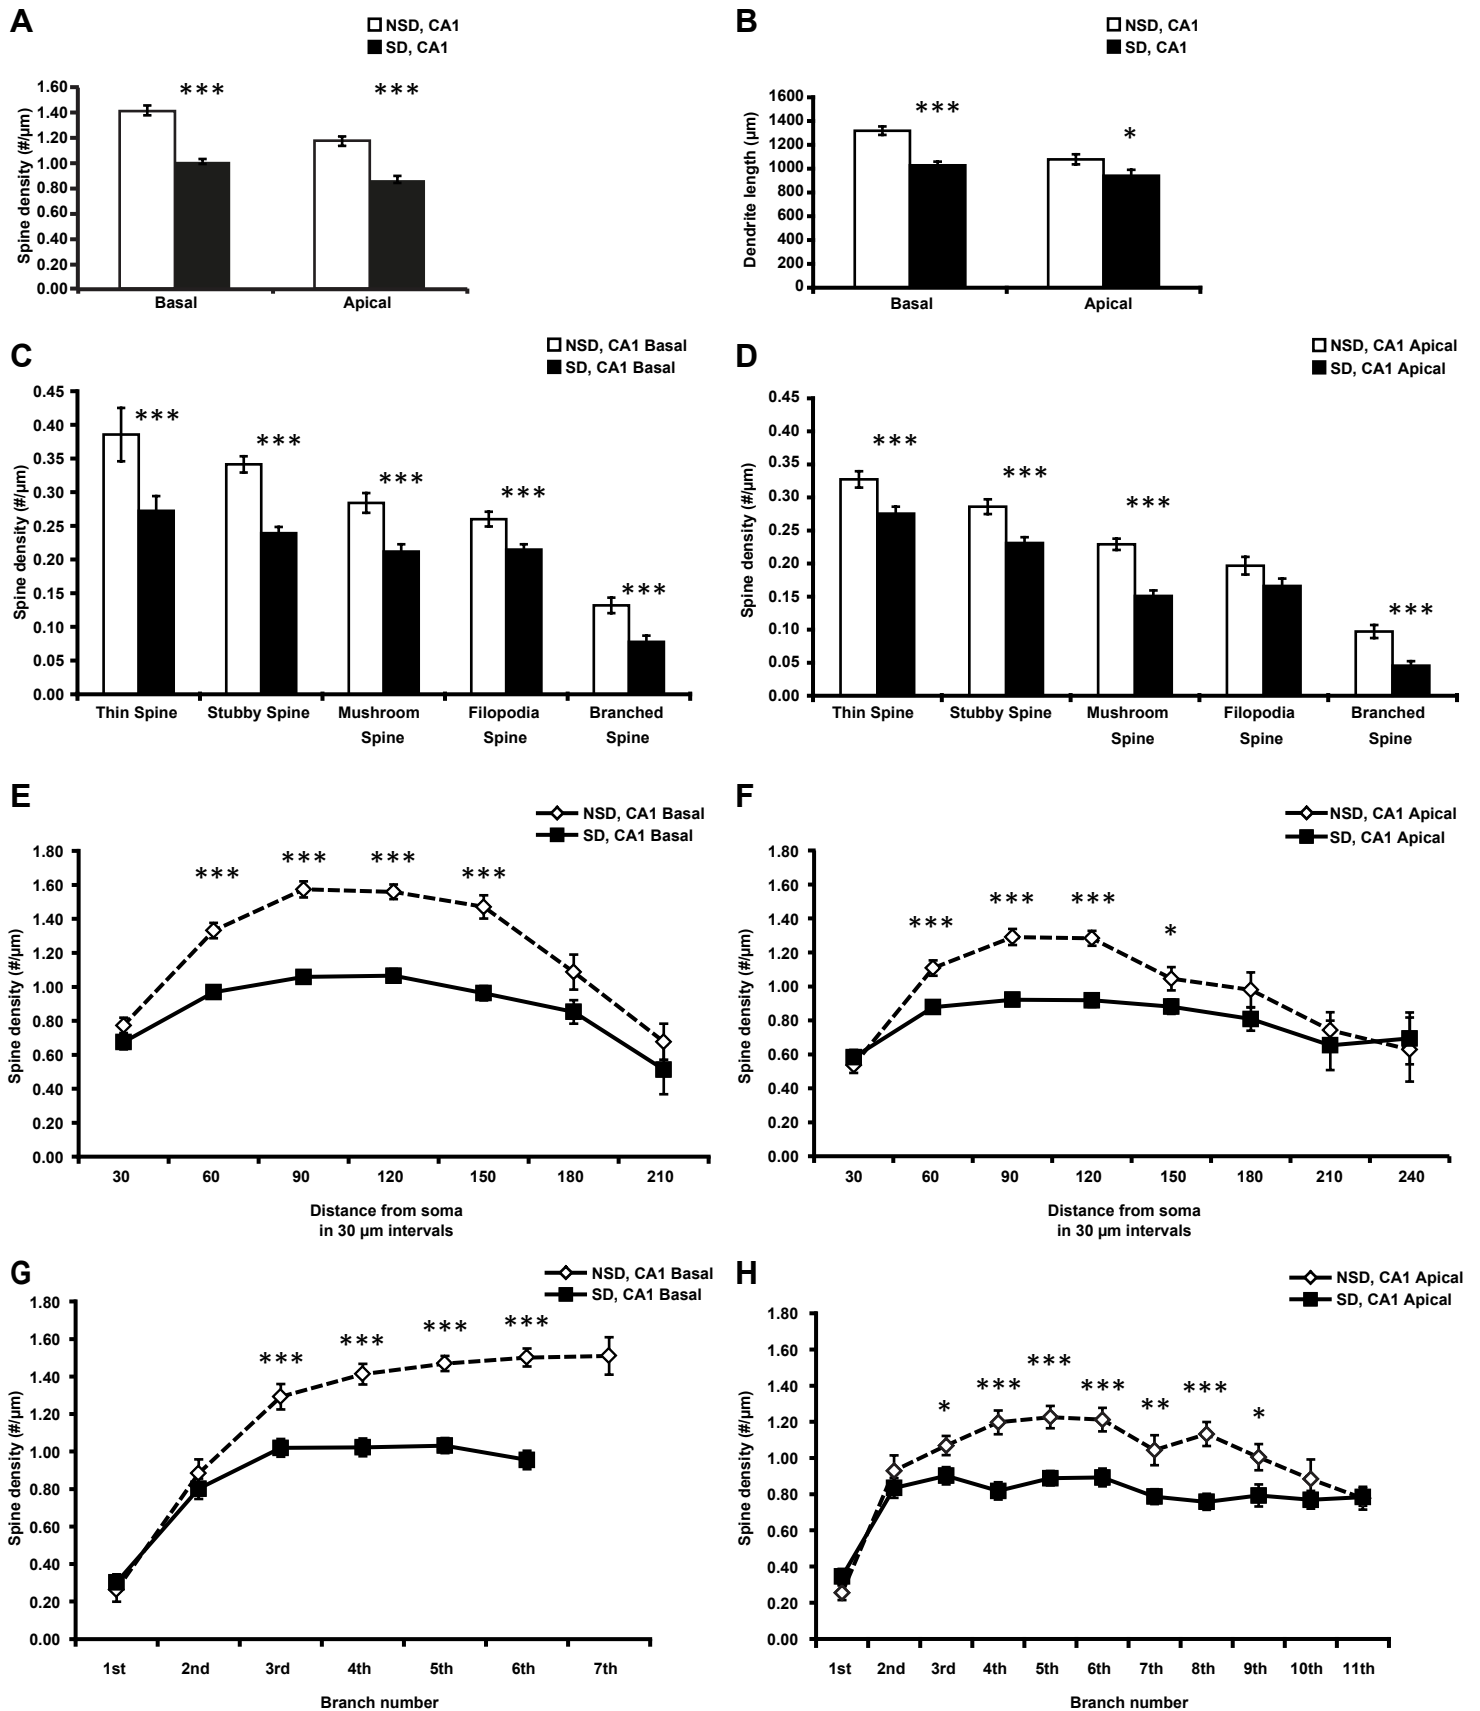

Supplement: supp [file elife-13424-supp-v1.zip]

Figure 3-figure supplement 2, Havekes et al

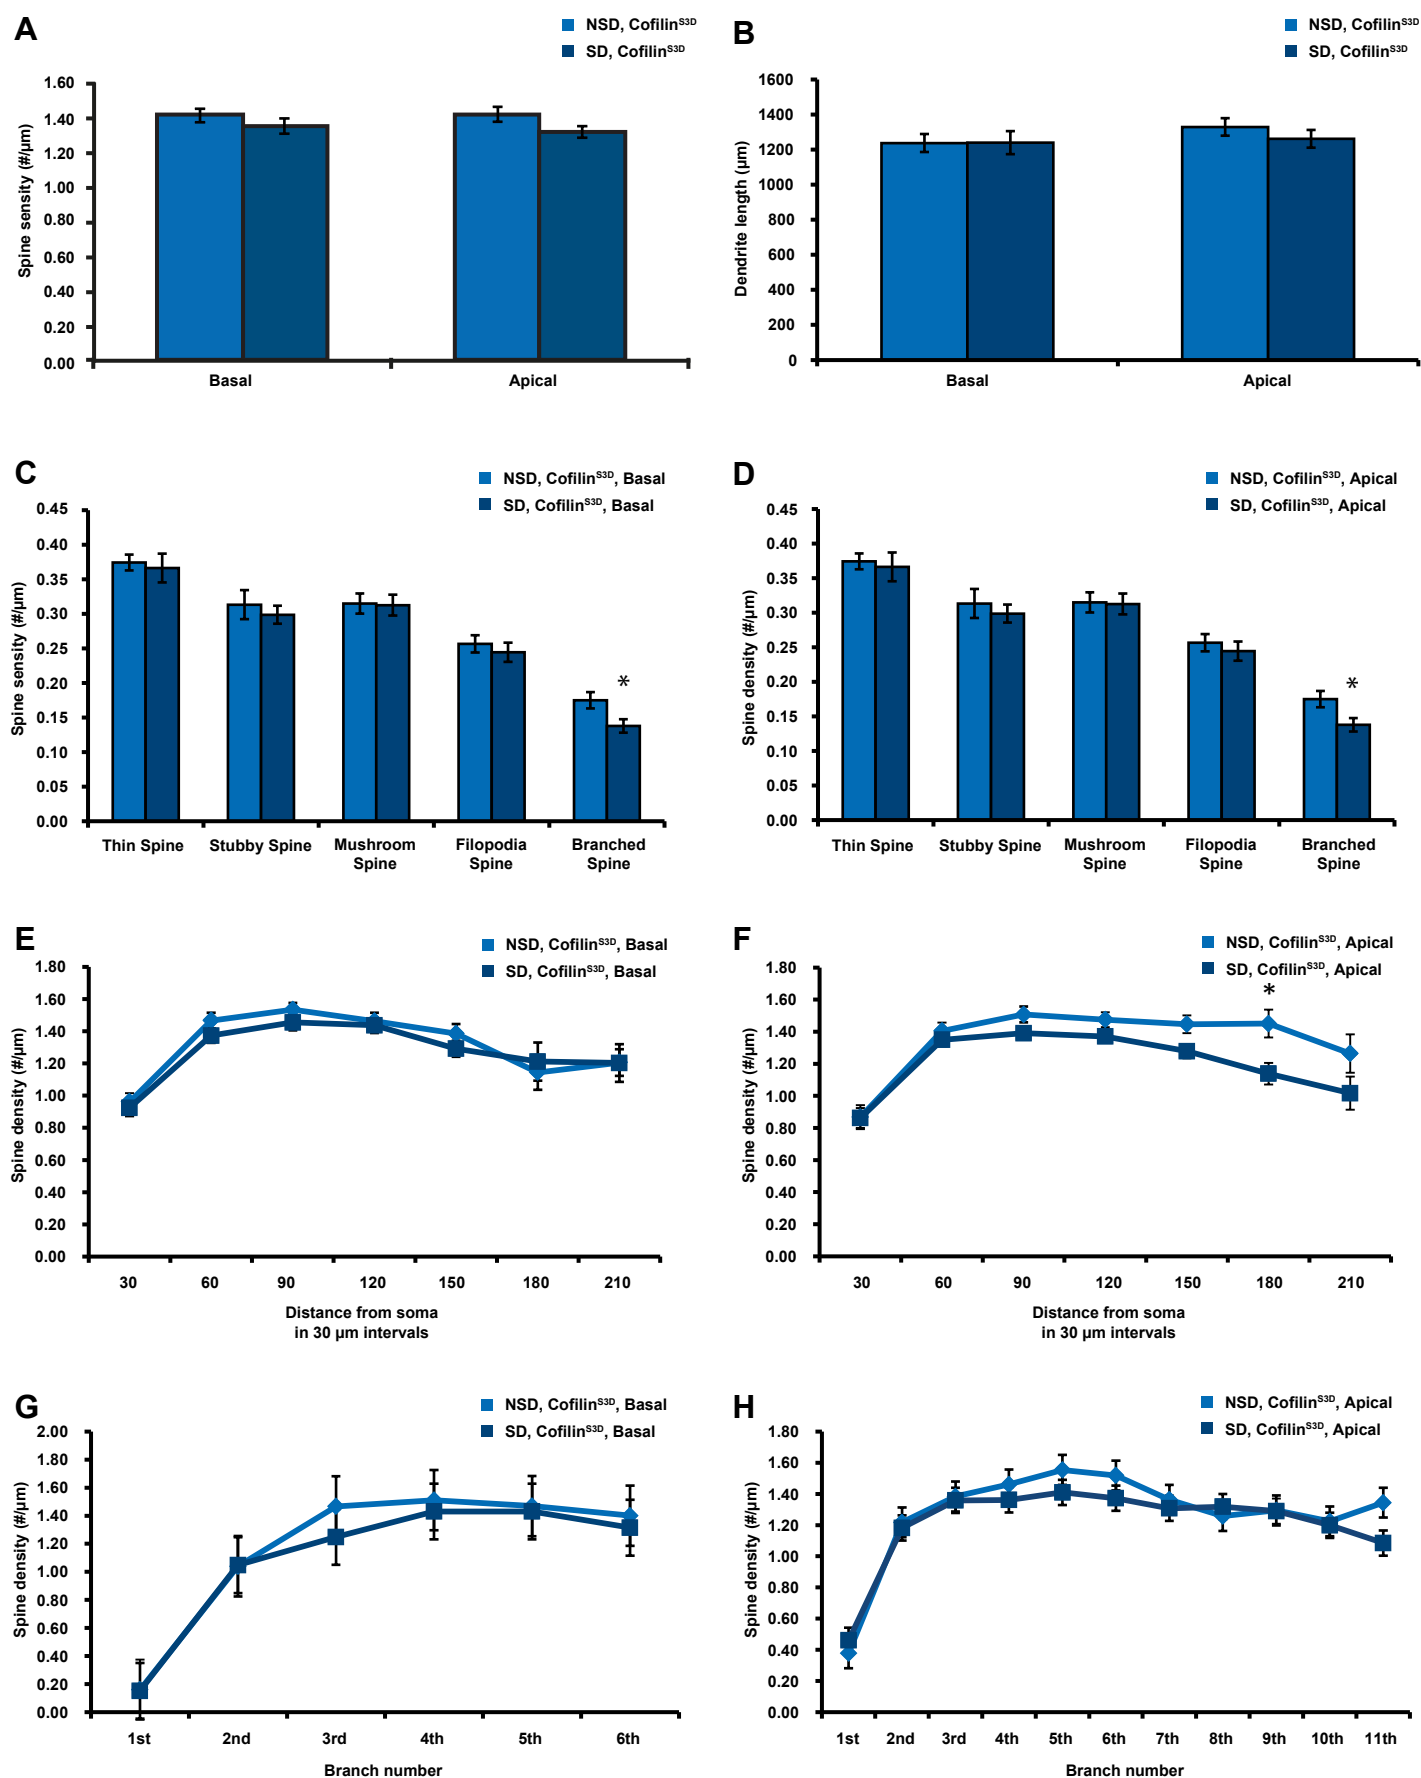

Supplement: supp [file elife-13424-supp-v1.zip]
